# Supplementary material for: Roles of acid-extruding ion transporters in regulation of breast cancer cell growth in a 3-dimensional microenvironment
Source: Springer Nature journal article supplement (doi:10.1186/s12943-016-0528-0), 2016-06-06

**Figure S1 (Andersen et al.)**

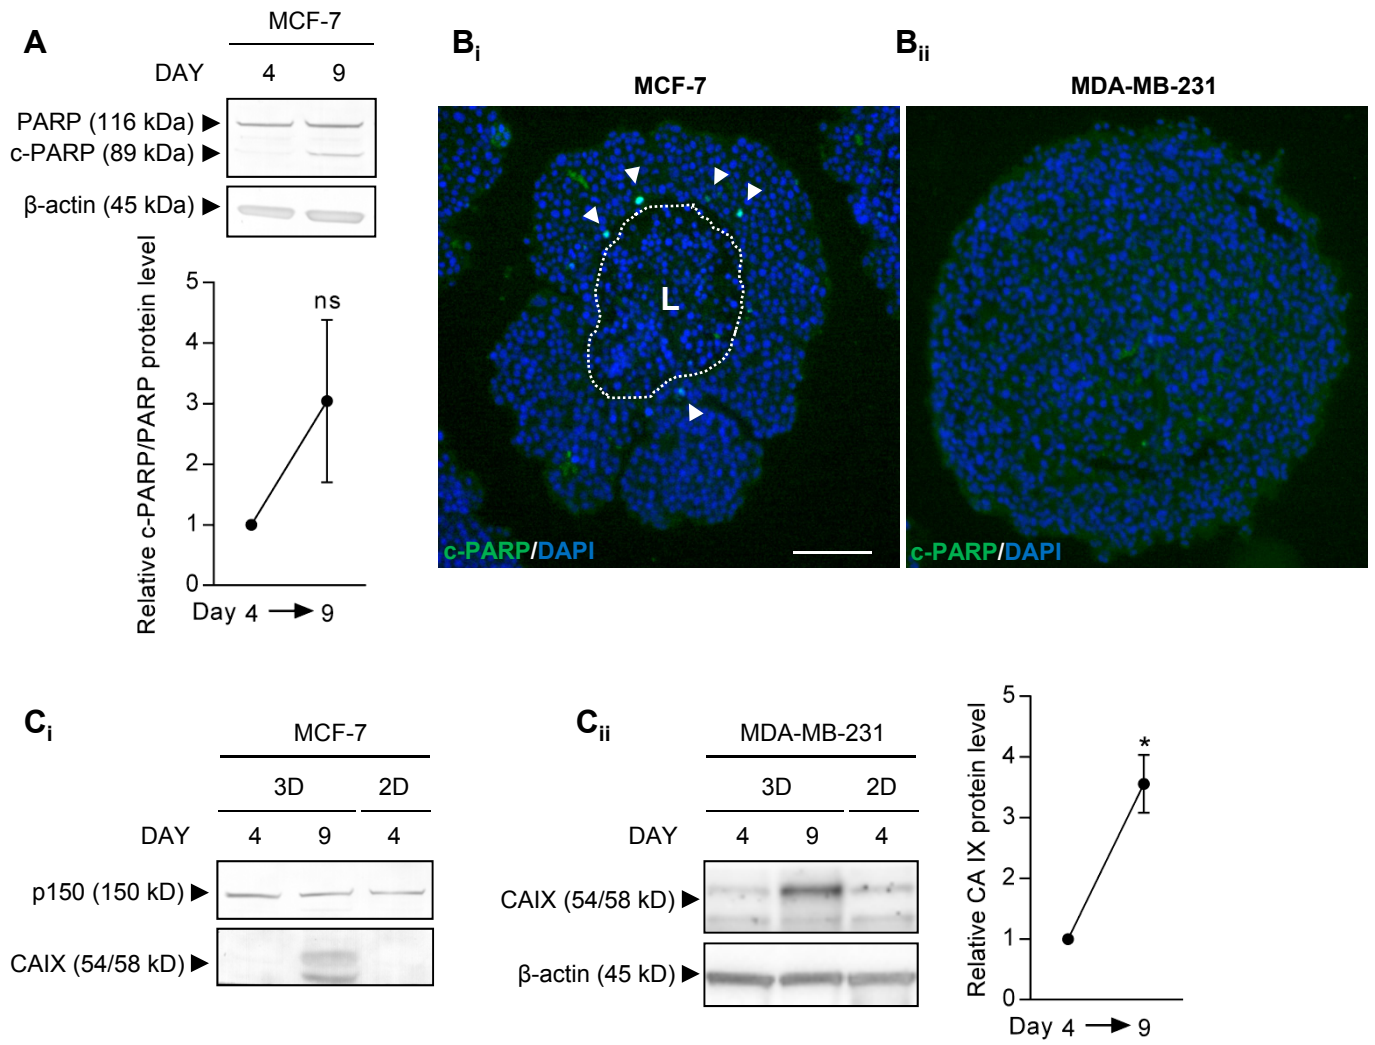

Supplement: MOESM1 [file 10244428]
